# Supplementary material for: Butyrate induced changes in Wnt-signaling specific gene expression in colorectal cancer cells
Source: PubMed Central journal article supplement (PMC4022274; doi:10.1186/1756-0500-7-226), 2014-04-09

**Michael Bordonaro, Ph.D.**

**November 15, 2011**

**4 Human cell samples**

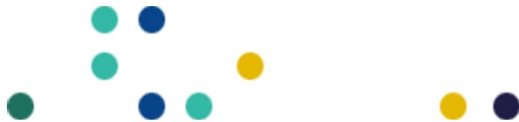

**RNA was extracted and purified using Ribopure (Ambion) RNA isolation**

**Total RNA samples were quantitated by UV spectrophotometry (OD260/280)**

**Quality of Total RNA was assessed using an Agilent Bioanalyzer**

**First and second strand cDNA was prepared from the total RNA samples**

**cRNA target was prepared from the DNA template and verified on the Bioanalyzer**

**cRNA was fragmented to uniform size and hybridized to Agilent Human v2 GE 4x44K arrays**

**Slides were washed and scanned on an Agilent G2565 Microarray Scanner**

**Data was analyzed with Agilent Feature Extraction and GeneSpring GX v7.3.1 software packages**

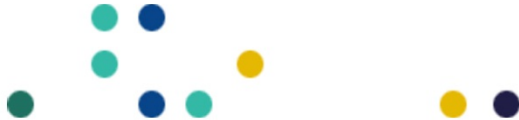

# Total RNA quality analysis

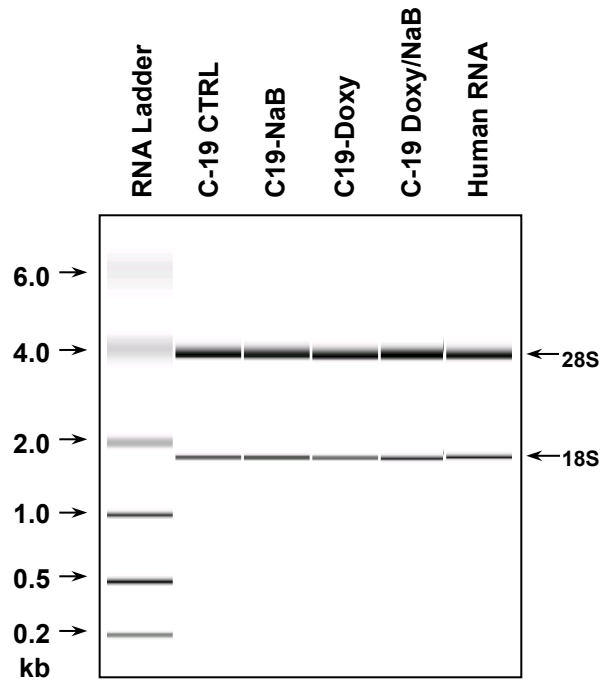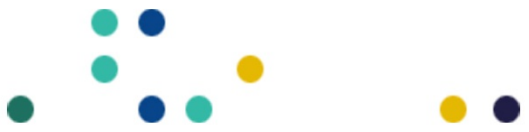

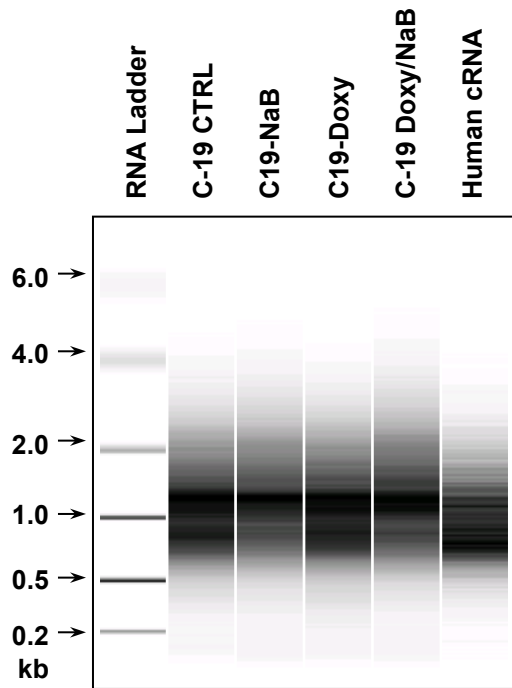

cRNA electropherograms

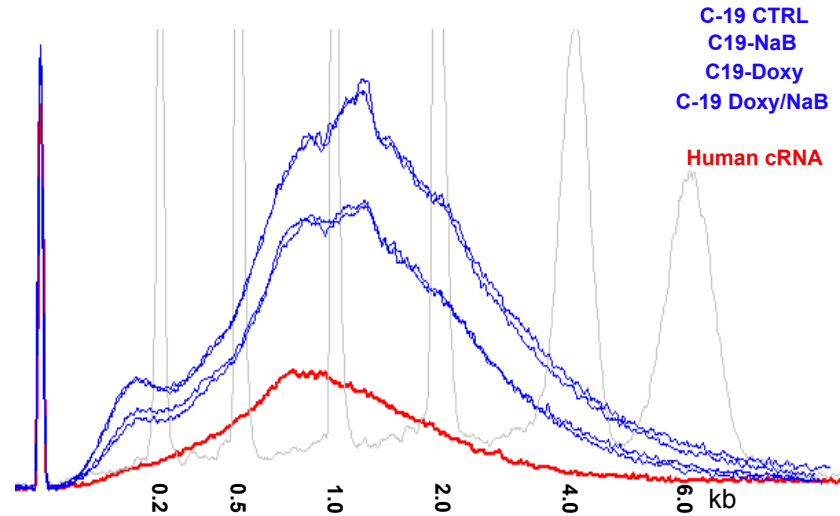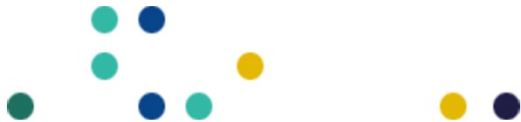

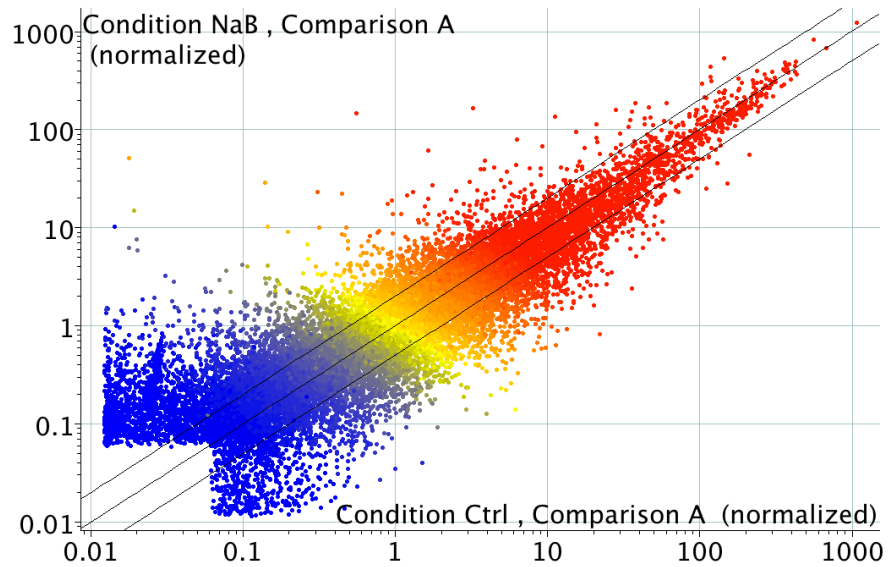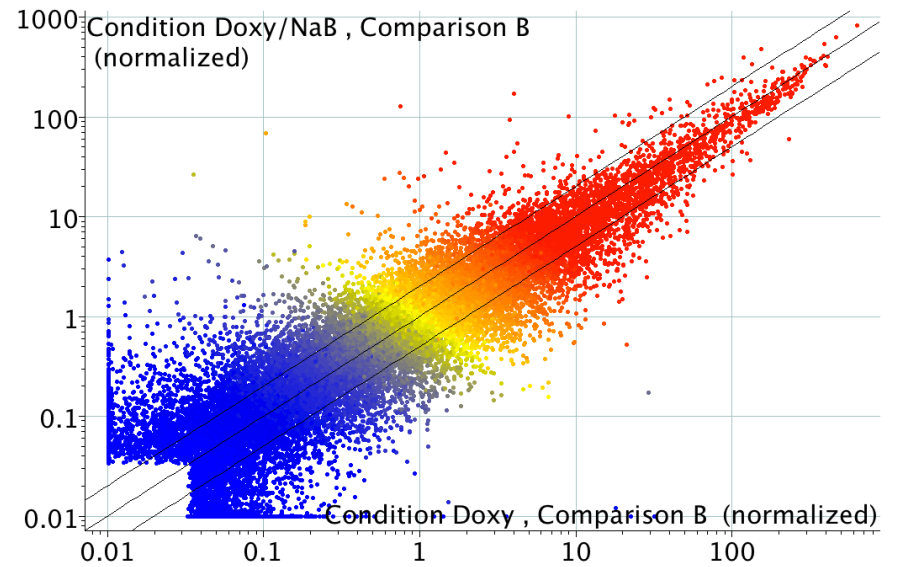

Probes above background in at least one sample per comparison (L:18,885 probes; R:22,169 probes). Intensity values are normalized to the 75th percentile intensity of each array. Diagonal lines indicate 2-fold differential expression. Red/Orange=High expression, Yellow=Medium expression, Blue=Low expression

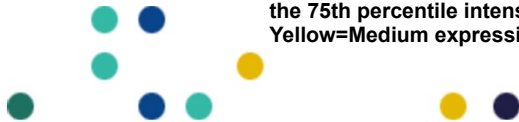

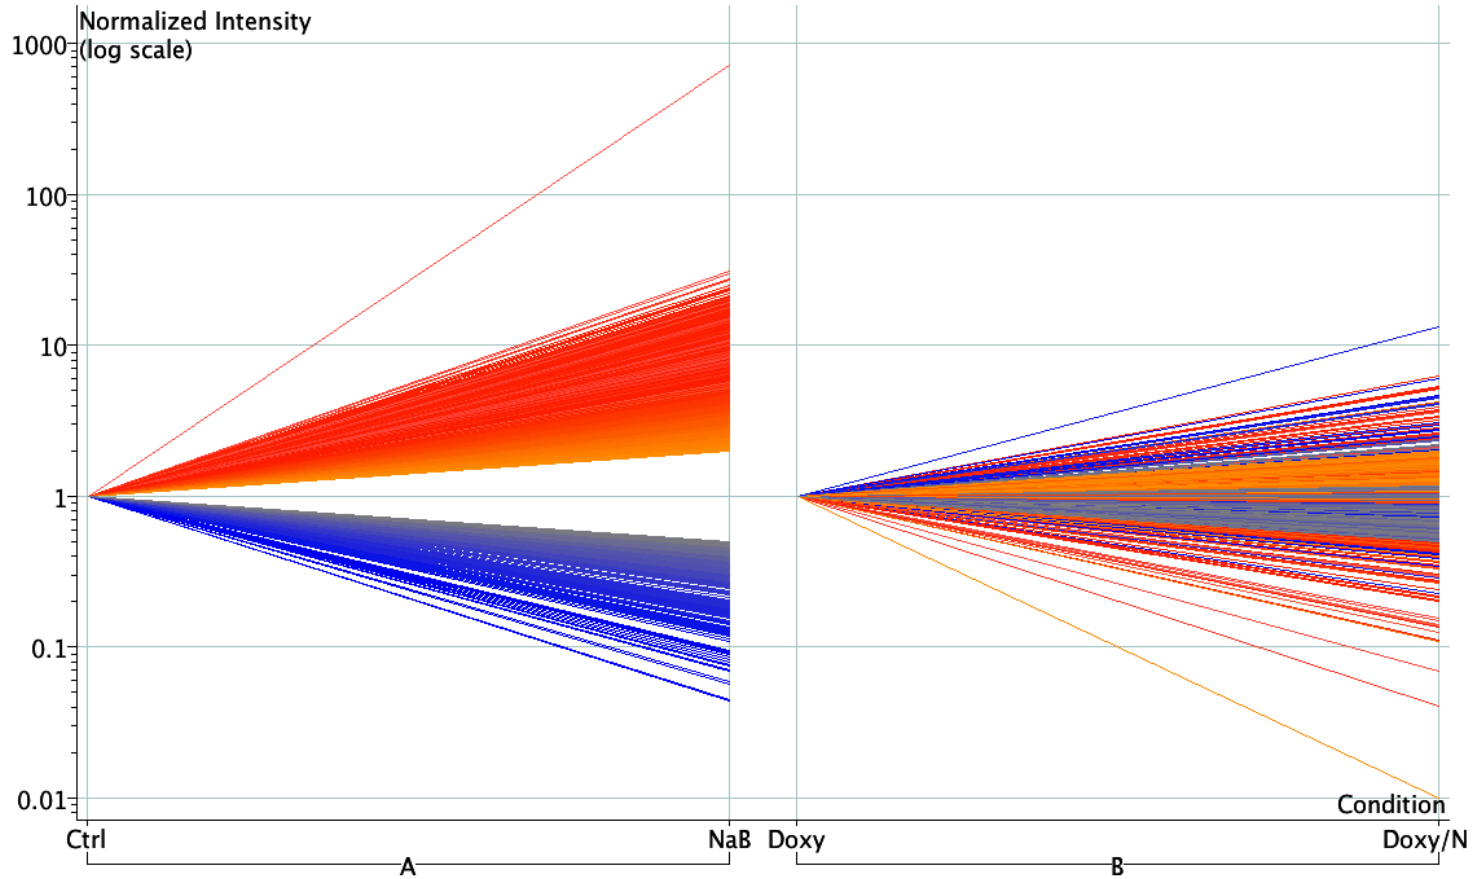

Differentially expressed (>2Fold) genes in NaB vs. Ctrl with opposite or undifferentiated expression in Doxy/NaB vs. Doxy (1,982 probes). Intensity values are normalized to the 75th percentile intensity of each array and further normalized to the control sample for each comparison. Genes are colored by the expression values in the NaB sample. Red/Orange=Up-regulated relative to Ctrl, Blue/Grey=Dn-regulated relative to Ctrl.

Confidential

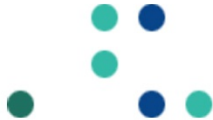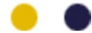

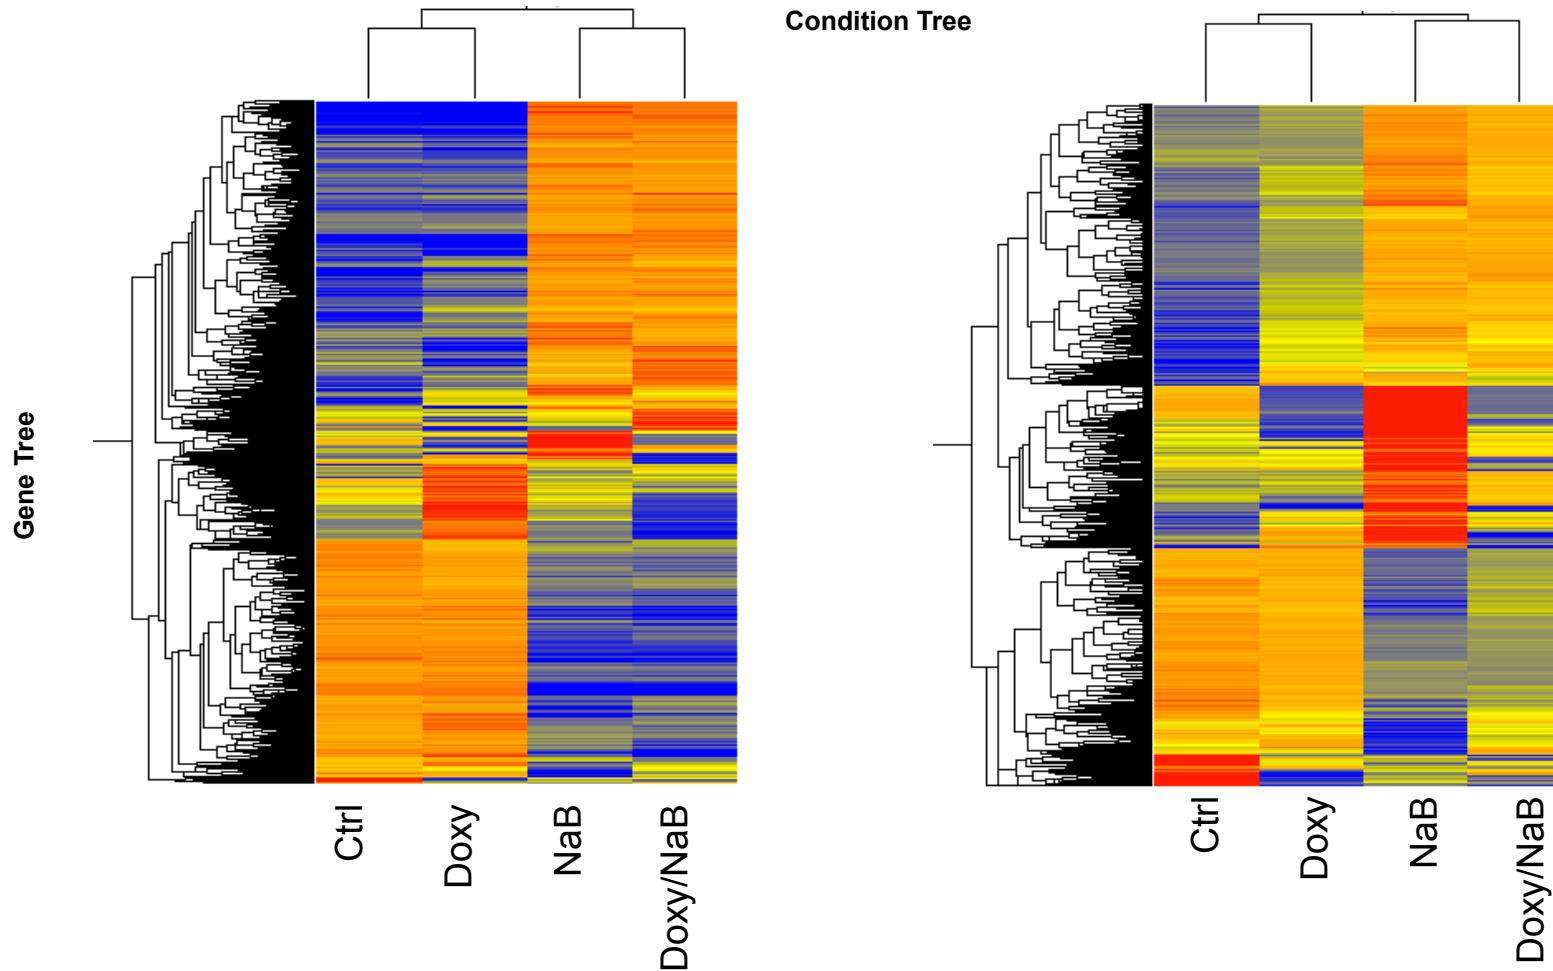

L: Differentially expressed genes (>2Fold, 10,963 probes) in at least one of two comparisons.

R: Differentially expressed genes (>2Fold, 1,982 probes) in NaB vs. Ctrl with opposite or undifferentiated expression in Doxy/NaB vs. Doxy.

All genes are normalized to the median expression across 4 samples. Red/Orange=Up-regulated relative to median, Yellow=Median expression, Blue=Dn-regulated relative to median.

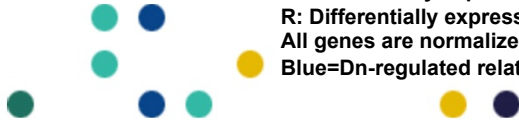

Supplement: 1756-0500-7-226-S1.pdf [file 1756-0500-7-226-S1.pdf]
